# Supplementary material for: Vitamin A regulates tissue-specific organ remodeling in diet-induced obesity independent of mitochondrial function
Source: PubMed Central journal article supplement (PMC9987331; doi:10.3389/fendo.2023.1118751), 2023-02-20
Supplement: DataSheet_1.pdf [file DataSheet_1.pdf]

## SUPPLEMENTARY MATERIAL

### FOR

## **Vitamin A regulates tissue-specific organ remodeling in diet-induced obesity independent of mitochondrial function**

**Ivanna Shymotiuk<sup>1, †</sup>, Natali Froese<sup>1, †</sup>, Christopher Werlein<sup>2</sup>, Lea Naasner<sup>1</sup>, Malgorzata Szaroszyk<sup>1</sup>, Mark P. Kühnel<sup>2, 3</sup>, Danny D. Jonigk<sup>2, 3</sup>, William S. Blaner<sup>4</sup>, Adam R. Wende<sup>5</sup>, E. Dale Abel<sup>6</sup>, Johann Bauersachs<sup>1</sup>, Christian Riehle<sup>1, \*</sup>**

<sup>1</sup> Department of Cardiology and Angiology, Hannover Medical School, Hannover, Germany

<sup>2</sup> Institute of Pathology, Hannover Medical School, Germany

<sup>3</sup> Biomedical Research in End-stage and Obstructive Lung Disease Hannover (BREATH), German Lung Research Centre (DZL), Hannover, Germany

<sup>4</sup> Department of Medicine, College of Physicians and Surgeons, Columbia University, New York, NY, USA

<sup>5</sup> Division of Molecular and Cellular Pathology, Department of Pathology, University of Alabama at Birmingham, Birmingham, AL, USA

<sup>6</sup> Department of Medicine, David Geffen School of Medicine and UCLA Health, Los Angeles, CA, USA

† These authors have contributed equally to this work and share first authorship.

**Supplemental Table 1: Composition of mouse diets**

| <b>Ingredient</b>   |                     | <b>Unit</b>     | <b>NCD</b>  | <b>HFD</b>  | <b>VAD</b>  | <b>VAD<br/>HFD</b> |
|---------------------|---------------------|-----------------|-------------|-------------|-------------|--------------------|
|                     |                     |                 |             |             |             |                    |
| <b>Carbohydrate</b> |                     | [% by calories] | <b>67.9</b> | <b>23.2</b> | <b>67.8</b> | <b>22.5</b>        |
| <b>Protein</b>      |                     | [% by calories] | <b>20.1</b> | <b>16.5</b> | <b>20.1</b> | <b>16.6</b>        |
| <b>Fat</b>          |                     | [% by calories] | <b>13.0</b> | <b>60.1</b> | <b>13.0</b> | <b>60.8</b>        |
|                     |                     |                 |             |             |             |                    |
| <b>Amino acids</b>  | Alanine             | [g/kg]          | 2.53        | 11.68       | 2.53        | 11.76              |
|                     | Arginine            | [g/kg]          | 9.83        | 13.33       | 9.83        | 13.43              |
|                     | Aspartic acid       | [g/kg]          | 3.58        | 12.26       | 3.59        | 12.45              |
|                     | Cystine             | [g/kg]          | 3.20        | 1.41        | 3.20        | 1.43               |
|                     | Glutamic acid       | [g/kg]          | 23.67       | 29.68       | 23.69       | 30.18              |
|                     | Glycine             | [g/kg]          | 3.14        | 24.10       | 3.14        | 24.25              |
|                     | Histidine           | [g/kg]          | 5.28        | 3.42        | 5.28        | 3.48               |
|                     | Isoleucine          | [g/kg]          | 7.22        | 7.13        | 7.23        | 7.30               |
|                     | Leucine             | [g/kg]          | 14.76       | 7.48        | 14.77       | 7.52               |
|                     | Lysine              | [g/kg]          | 17.40       | 11.75       | 17.40       | 11.91              |
|                     | Methionine          | [g/kg]          | 7.22        | 4.32        | 10.69       | 4.41               |
|                     | Phenylalanine       | [g/kg]          | 7.17        | 7.04        | 7.18        | 7.16               |
|                     | Proline             | [g/kg]          | 12.76       | 20.46       | 12.77       | 20.67              |
|                     | Serine              | [g/kg]          | 5.27        | 8.12        | 5.27        | 8.25               |
|                     | Threonine           | [g/kg]          | 7.15        | 6.16        | 7.16        | 6.27               |
|                     | Tryptophan          | [g/kg]          | 1.98        | 1.25        | 1.98        | 1.29               |
|                     | Tyrosine            | [g/kg]          | 9.29        | 5.12        | 9.29        | 5.23               |
|                     | Valine              | [g/kg]          | 3.30        | 7.49        | 3.30        | 7.64               |
|                     |                     |                 |             |             |             |                    |
| <b>Fatty acids</b>  | C4, Butyric         | [g/kg]          |             | 4.19        |             | 4.36               |
|                     | C7, Caproic         | [g/kg]          |             | 3.68        |             | 3.83               |
|                     | C8, Caprylic        | [g/kg]          |             | 1.27        |             | 1.32               |
|                     | C10, Capric         | [g/kg]          |             | 2.62        |             | 2.72               |
|                     | C12, Lauric         | [g/kg]          | 0.05        | 3.13        | 0.05        | 3.25               |
|                     | C14, Myristic       | [g/kg]          | 0.10        | 13.90       | 0.10        | 14.34              |
|                     | C16, Palmitic       | [g/kg]          | 2.50        | 56.56       | 2.50        | 56.67              |
|                     | C17, Margaric       | [g/kg]          | 0.10        | 0.43        | 0.10        | 0.43               |
|                     | C18, Stearic        | [g/kg]          | 1.35        | 37.17       | 1.35        | 37.49              |
|                     | C20, Arachidic      | [g/kg]          | 0.05        | 3.79        | 0.05        | 3.79               |
|                     | C22, Behenic        | [g/kg]          | 0.15        |             | 0.15        |                    |
|                     | C24, Lignoceric     | [g/kg]          | 0.25        |             | 0.25        |                    |
|                     | C16:1, Palmitoleic  | [g/kg]          | 0.15        | 8.90        | 0.15        | 8.99               |
|                     | C18:1, Oleic        | [g/kg]          | 13.50       | 111.56      | 13.50       | 112.45             |
|                     | C-20:1, Eicosaenoic | [g/kg]          | 0.15        | 1.71        | 0.15        | 1.71               |
|                     | C22:1, Erucic       | [g/kg]          | 0.05        | 1.75        | 0.05        | 1.82               |
|                     | C18:2, Linoleic     | [g/kg]          | 28.50       | 22.12       | 28.50       | 22.17              |
|                     | C18:3, Linolenic    | [g/kg]          | 0.15        | 3.13        | 0.15        | 3.16               |

| <b>Ingredient</b>  |                          | <b>Unit</b> | <b>NCD</b> | <b>HFD</b> | <b>VAD</b> | <b>VAD<br/>HFD</b> |
|--------------------|--------------------------|-------------|------------|------------|------------|--------------------|
| <b>Vitamins</b>    | Biotin                   | [mg/kg]     | 0.20       | 0.20       | 0.20       | 0.20               |
|                    | Choline chloride         | [g/kg]      | 1.01       | 1.00       | 1.01       | 1.00               |
|                    | Folic acid               | [mg/kg]     | 10.00      | 10.02      | 10.01      | 10.02              |
|                    | Nicotinic acid           | [mg/kg]     | 50.17      | 50.03      | 50.17      | 50.03              |
|                    | Pantothenic acid         | [mg/kg]     | 50.11      | 50.02      | 50.11      | 50.02              |
|                    | Vitamin A                | [I.E./kg]   | 15,000     | 15,000     |            |                    |
|                    | Vitamin B1               | [mg/kg]     | 20.04      | 20.01      | 20.04      | 20.01              |
|                    | Vitamin B2               | [mg/kg]     | 20.32      | 20.06      | 20.32      | 20.06              |
|                    | Vitamin B6               | [mg/kg]     | 15.23      | 15.21      | 15.03      | 15.01              |
|                    | Vitamin B12              | [mg/kg]     | 0.04       | 0.03       | 0.04       | 0.03               |
|                    | Vitamin C                | [mg/kg]     | 20.00      | 20.00      | 21.00      | 21.00              |
|                    | Vitamin D3               | [I.E./kg]   | 500.00     | 500.00     | 500.00     | 500.00             |
|                    | Vitamin E                | [mg/kg]     | 180.40     | 150.07     | 180.40     | 150.07             |
|                    | Vitamin K3               | [mg/kg]     | 10.20      | 10.00      | 10.20      | 10.00              |
|                    |                          |             |            |            |            |                    |
| <b>Nutrients</b>   | Aluminum                 | [mg/kg]     | 3.71       | 2.37       | 3.74       | 2.45               |
|                    | Calcium                  | [g/kg]      | 9.31       | 7.21       | 9.54       | 7.28               |
|                    | Chlorine                 | [g/kg]      | 3.63       | 3.93       | 3.63       | 4.00               |
|                    | Cobalt                   | [mg/kg]     | 0.15       | 0.09       | 0.15       | 0.09               |
|                    | Copper                   | [mg/kg]     | 5.75       | 3.32       | 5.65       | 3.32               |
|                    | Fluorine                 | [mg/kg]     | 4.17       | 3.03       | 4.17       | 3.03               |
|                    | Iodine                   | [mg/kg]     | 0.51       | 0.27       | 0.45       | 0.27               |
|                    | Iron                     | [mg/kg]     | 178.58     | 104.43     | 178.61     | 104.42             |
|                    | Magnesium                | [g/kg]      | 0.68       | 0.60       | 0.67       | 0.60               |
|                    | Manganese                | [mg/kg]     | 100.89     | 58.94      | 100.89     | 58.95              |
|                    | Molybdenum               | [mg/kg]     | 0.20       | 0.18       | 0.20       | 0.18               |
|                    | Phosphorus<br>(digested) | [g/kg]      | 7.20       | 4.45       | 7.21       | 4.49               |
|                    | Phosphorus (total)       | [g/kg]      | 7.52       | 5.35       | 7.53       | 5.41               |
|                    | Potassium                | [g/kg]      | 7.09       | 6.58       | 7.17       | 6.67               |
|                    | Selenium                 | [mg/kg]     | 0.33       | 0.17       | 0.33       | 0.17               |
|                    | Sodium                   | [g/kg]      | 2.49       | 1.67       | 2.50       | 1.67               |
|                    | Sulfur                   | [g/kg]      | 2.79       | 1.42       | 2.79       | 0.68               |
|                    | Zinc                     | [mg/kg]     | 29.30      | 15.24      | 29.31      | 15.24              |
|                    |                          |             |            |            |            |                    |
| <b>Supplements</b> | Cholesterol              | [mg/kg]     |            | 211.85     |            | 211.85             |
|                    | Chondroitin              | [g/kg]      |            | 31.20      |            | 31.20              |
|                    | Glucosamine              | [g/kg]      |            | 66.00      |            | 66.00              |
|                    | Inositol                 | [mg/kg]     | 111.00     | 101.93     | 111.00     | 101.93             |

NCD, normal chow diet; HFD, high fat diet; VAD, vitamin A-deficient diet; VAD HFD, vitamin A-deficient high fat diet.

**Supplemental Table 2:** *Antibodies used for immunoblotting*

| <b>Antigen</b> | <b>Company</b>                              | <b>Catalog number</b> |
|----------------|---------------------------------------------|-----------------------|
| 4-HNE          | Abcam, Cambridge, MA, USA                   | 46545                 |
| ATP5A          | Abcam, Cambridge, MA, USA                   | 14748                 |
| MnSOD          | BD Biosciences, San Jose CA, USA            | 611580                |
| NDUFA9         | Abcam, Cambridge, MA, USA                   | 14713                 |
| SDHA           | Abcam, Cambridge, MA, USA                   | 14715                 |
| UCP3           | Abcam, Cambridge, MA, USA                   | 180643                |
| Vinculin       | Santa Cruz Biotechnology, Santa Cruz, CA    | 7649                  |
| Anti-goat      | Jackson ImmunoResearch, West Grove, PA, USA | 305-035-045           |
| Anti-mouse     | GE HealthCare, Chicago, IL, USA             | NA934V                |
| Anti-rabbit    | GE HealthCare, Chicago, IL, USA             | NXA931V               |

**Supplemental Table 3: Primers used for quantitative real-time PCR analysis**

| <b>Gene Name</b>                                                                             | <b>Gene Sequence of forward and reverse primers (5' → 3')</b> | <b>GenBank Accession Number</b> |
|----------------------------------------------------------------------------------------------|---------------------------------------------------------------|---------------------------------|
| <i>Carnitine palmitoyltransferase 1b (Cpt1b)</i>                                             | TGCCTTTACATCGTCTCCAA<br>AGACCCCGTAGCCATCATC                   | NM_009948.2                     |
| <i>Citrate synthase (Cs)</i>                                                                 | CTCACAGTGGGGTGCTGCT<br>CCCAGTCTCCCATTTTACCC                   | NM_026444.4                     |
| <i>Collagen, type I, alpha 1 (Col1a1)</i>                                                    | TGGTGAACGTGGTGTACAAGGT<br>CAGTATCACCCCTTGGCACCAT              | NM_007742.4                     |
| <i>Collagen, type III, alpha 1 (Col3a1)</i>                                                  | AAGGCTGAAGGAAACAGCAA<br>TGGGGTTTCAGAGAGTTTGG                  | NM_009930.2                     |
| <i>Hydroxyacyl-CoA dehydrogenase trifunctional multienzyme complex subunit alpha (Hadha)</i> | TCAGGAGGGCTCAAAGAATAA<br>GAAAGCCAAGCCCAAAGAC                  | NM_178878.3                     |
| <i>Hydroxyacyl-CoA dehydrogenase trifunctional multienzyme complex subunit beta (Hadhb)</i>  | GCCAACAGACTGAGGAAGGA<br>ACACTGGCAAGGCTGGATT                   | NM_001289798.1                  |
| <i>Hypoxanthine guanine phosphoribosyl transferase (Hprt)</i>                                | GGACCTCTCGAAGTGTTGGATAC<br>GCTCATCTTAGGCTTTGTATTTGGCT         | NM_013556.2                     |
| <i>Ribosomal protein S16 (Rps16)</i>                                                         | TGCTGGTGTGGATATTCGGG<br>CCTTGAGATGGGCTTATCGG                  | NM_013647.2                     |
| <i>Tissue inhibitor of metalloproteinase 1 (Timp1)</i>                                       | TCTGAGCCCTGCTCAGCAA<br>AACAGGGAAACACTGTGCACAC                 | NM_001044384.1                  |

**Supplemental Table 4:** Analysis of liver sections according to NAFLD Activity Score (NAS)

| <b>Endpoint</b>                    | <b>NCD</b>  | <b>HFD</b>    | <b>VAD</b>  | <b>VAD HFD</b> |
|------------------------------------|-------------|---------------|-------------|----------------|
| Steatosis<br>[Score] #, \$         | 0.20 ± 0.13 | 2.20 ± 0.25 * | 0.00 ± 0.00 | 1.20 ± 0.39 *† |
| Lobular inflammation<br>[Score] #  | 0.00 ± 0.00 | 0.50 ± 0.17   | 0.00 ± 0.00 | 0.50 ± 0.22    |
| Hepatocyte ballooning<br>[Score] # | 0.30 ± 0.21 | 0.70 ± 0.21   | 0.11 ± 0.11 | 0.80 ± 0.13    |
| NAS<br>#                           | 0.50 ± 0.31 | 3.40 ± 0.31 * | 0.11 ± 0.11 | 2.50 ± 0.64 *  |

Data are reported as mean values ± SE, n=9-10. Two-way ANOVA was performed to analyze differences by HFD feeding and VitA. Results of post-hoc analyses for each comparison are summarized by symbols as defined: # p<0.05 for HFD feeding and \$ p<0.05 for VitA. No significant effect for the interaction between HFD feeding and VitA was determined. \* p<0.05 vs. normocaloric diet same VitA availability, † p<0.05 vs. VitA sufficiency same caloric diet.
